# Supplementary material
Source: PubMed Central journal article supplement (PMC8918067)
Supplement: NIHMS1783817-supplement-Supp_Fig_S1.pdf [file NIHMS1783817-supplement-Supp_Fig_S1.pdf]

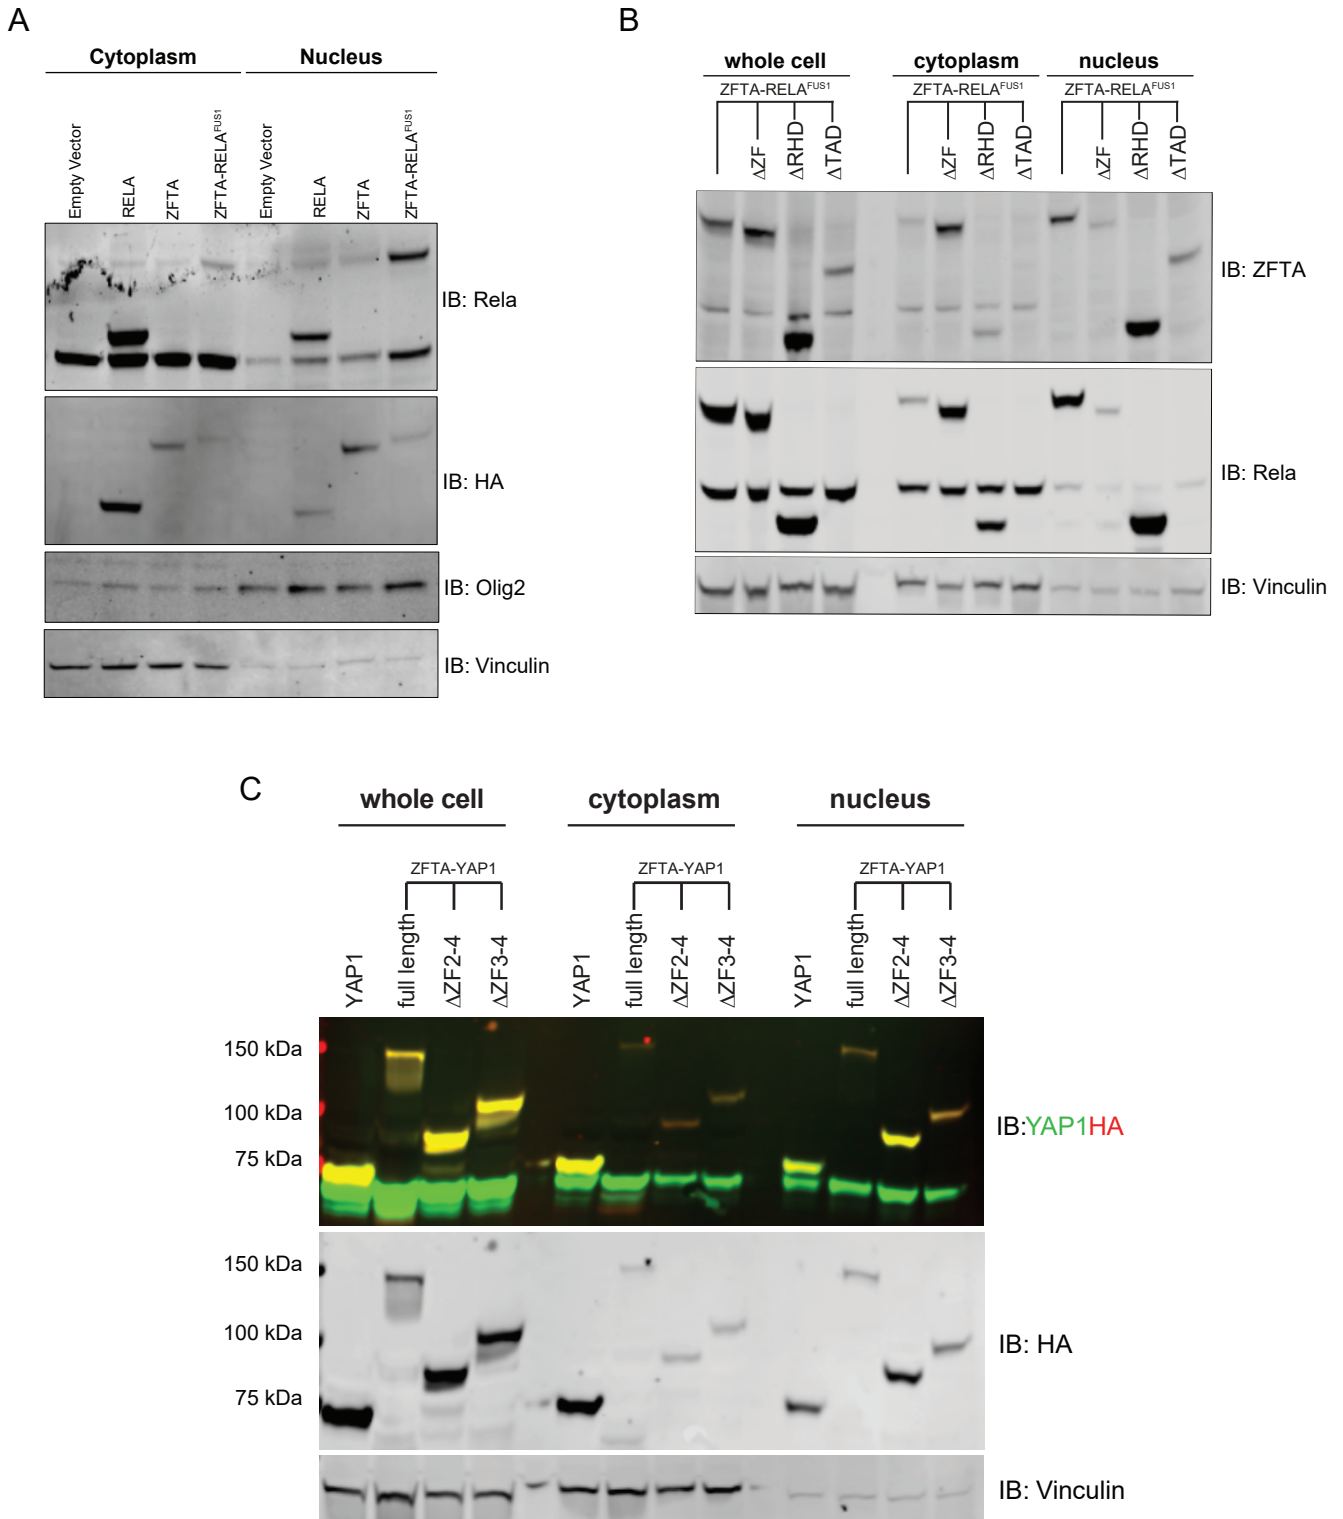

**Figure S1. Domain mapping of ZFTA-RELA<sup>FUS1</sup> and ZFTA-YAP1<sup>FUS1</sup> driven nuclear translocation in mNSCs: A.** Immunoblots (IB) with indicated antibodies of cytoplasmic and nuclear fractions of HA-tagged proteins in mNSCs. Vinculin (cytoplasmic) and Olig2 (nuclear) are loading controls. **B.** Immunoblots probed with indicated antibodies of cytoplasmic and nuclear fractions of HA-tagged proteins in mNSCs transduced with full-length ZFTA-RELA<sup>FUS1</sup> or the indicated deletion mutants. **C.** Immunoblots probed with indicated antibodies of cytoplasmic and nuclear fractions in mNSCs transduced with of HA-tagged full-length or deletion mutant proteins.
