# Supplementary material
Source: PubMed Central journal article supplement (PMC8918067)
Supplement: NIHMS1783817-supplement-Supp_Fig_S2.pdf [file NIHMS1783817-supplement-Supp_Fig_S2.pdf]

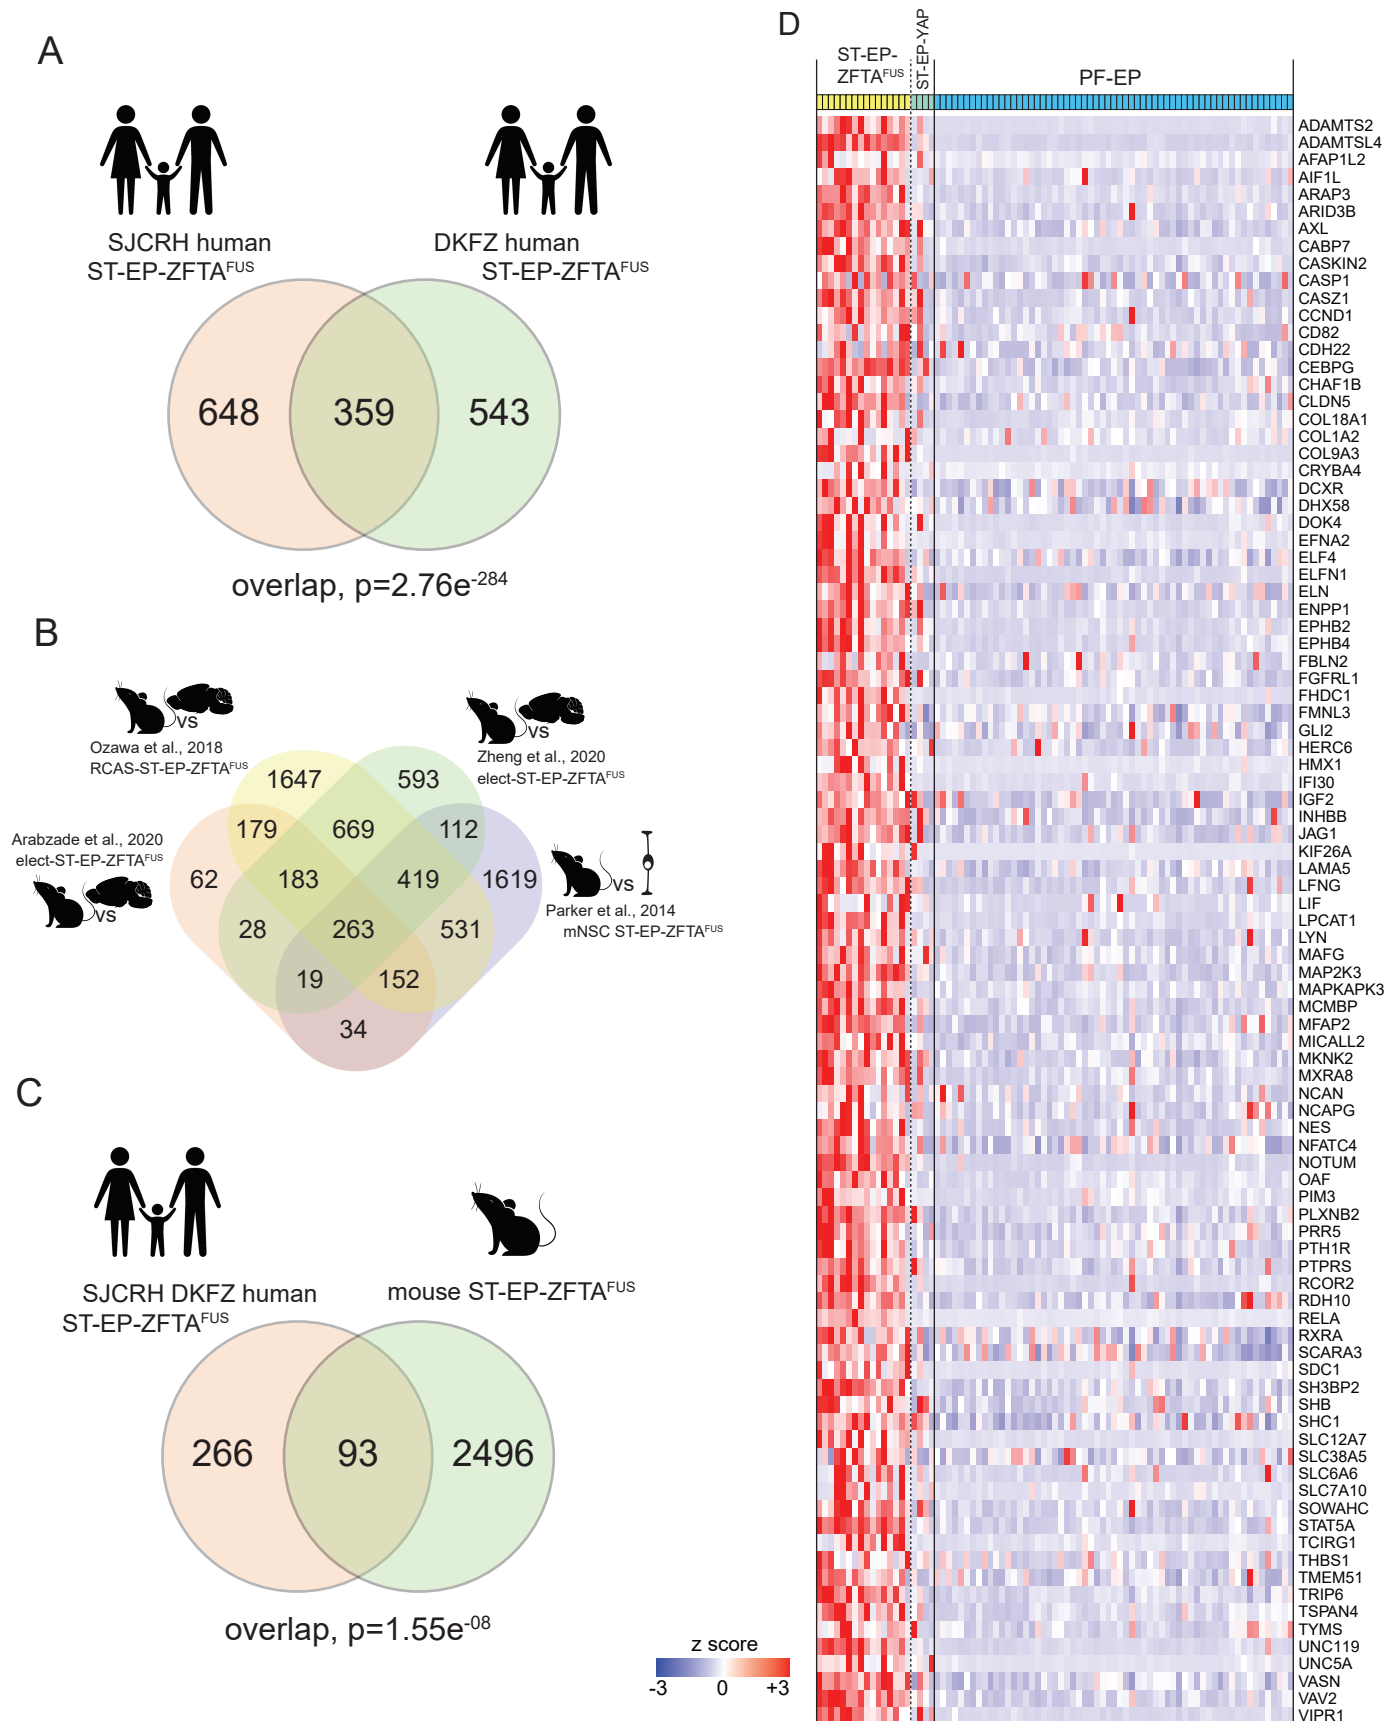

**Figure S2. A common mouse and human ZFTA-RELA<sup>FUS1</sup> ependymoma transcriptome: A.** Overlap in genes upregulated specifically in two independent cohorts of human ST-EP-ZFTA<sup>FUS</sup> ependymoma (Refs. 6,8). **B.** Overlap in genes upregulated in four different mouse models of ZFTA-RELA<sup>FUS1</sup>-driven ependymoma relative to normal brain (Arabzade et al., Ozawa et al., and Zheng et al.,) or mNSCs (Parker et al.,). **C.** Ninety-three genes comprising the ZFTA<sup>FUS</sup>-sig overlap between the 359 genes upregulated specifically in human ST-EP-ZFTA<sup>FUS</sup> ependymoma from (A) and at least two mouse models in (B). **D.** Heatmap of RNAseq gene expression in the SJCRRH cohort of the 93 core gene set commonly upregulated in human and mouse ZFTA-RELA<sup>FUS1</sup>-driven ependymoma in C.
