# Supplementary material
Source: PubMed Central journal article supplement (PMC8918067)
Supplement: NIHMS1783817-supplement-Supp_Fig_S3.pdf [file NIHMS1783817-supplement-Supp_Fig_S3.pdf]

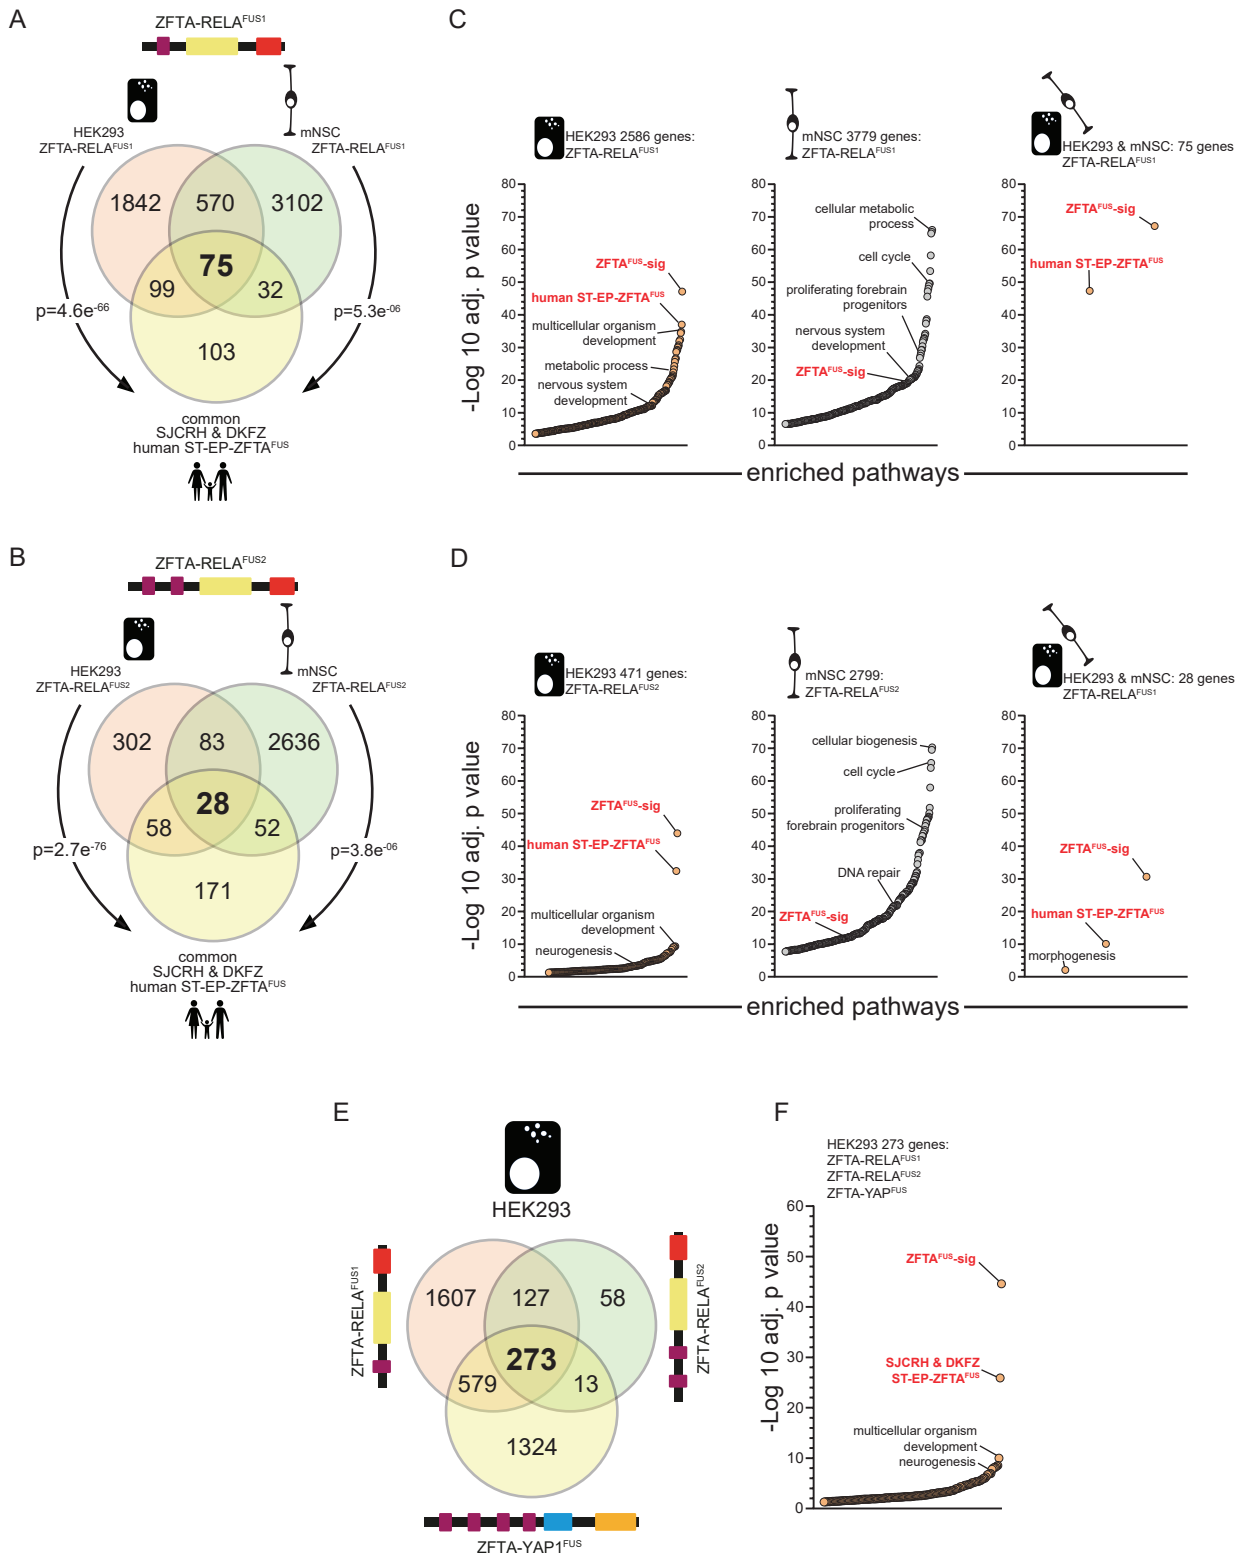

**Figure S3. ZFTA-RELA<sup>FUS1</sup>, ZFTA-RELA<sup>FUS2</sup> and ZFTA-YAP1<sup>FUS</sup> upregulate a human ST-EP-ZFTA<sup>FUS</sup> specific transcriptome in HEK3 cells and mNSCs:** **A.** Overlap in genes upregulated specifically in human ST-EP-ZFTA<sup>FUS</sup> tumors from two independent patient cohorts (SJCRH and DKFZ) versus those upregulated by ZFTA-RELA<sup>FUS1</sup> in HEK293 and mNSCs (p values are representation statistic for overlap). **B.** Pathway enrichment among 18,000 genesets of genes identified in (A). **C** and **D** reports a similar analysis of genes upregulated in ST-EP-ZFTA<sup>FUS</sup> tumors versus those upregulated by ZFTA-RELA<sup>FUS2</sup> in HEK293 and mNSCs. **E.** Overlap in genes upregulated by the indicated ZFTA fusion genes in HEK293 cells (p values are representation statistic for overlap). **F.** Pathway enrichment in the indicated genesets identified in (E).
