# Supplementary material
Source: PubMed Central journal article supplement (PMC8918067)
Supplement: NIHMS1783817-supplement-Supp_Fig_S4.pdf [file NIHMS1783817-supplement-Supp_Fig_S4.pdf]

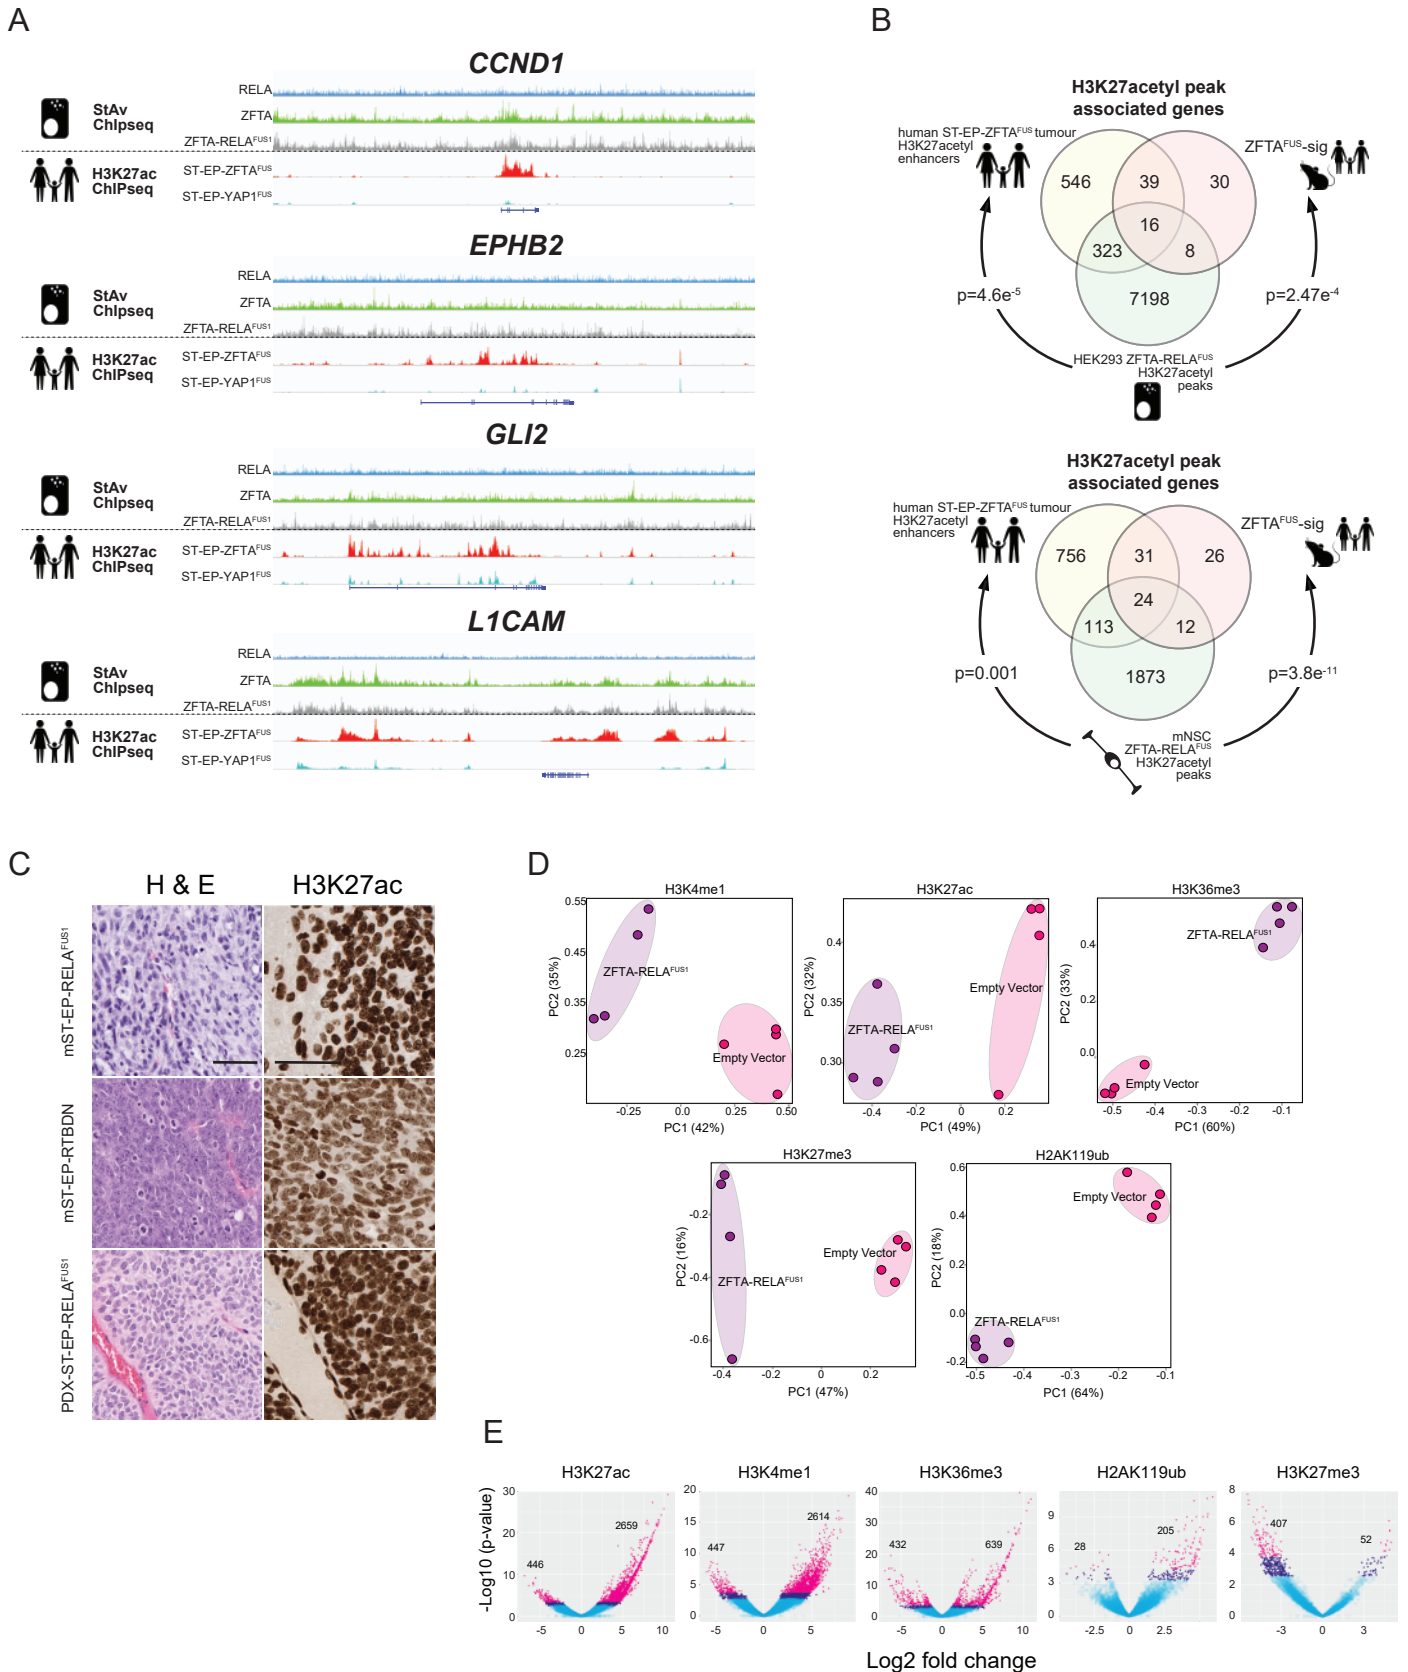

**Figure S4. ZFTA-RELA<sup>FUS1</sup> chromatin binding and remodelling:** **A.** Top shows ChIP-seq profiles of RELA, ZFTA or ZFTA-RELA<sup>FUS1</sup> binding profiles within the indicated genes in HEK293 cells. Bottom shows H3K27ac ChIP-seq of human ST-EP-ZFTA<sup>FUS</sup> ependymoma. **B.** Venn diagram of overlap in ChIP-seq detected DNA binding sites of the indicated genes using DiffBind. P-values report representation factor for overlap of indicated binding sites. **C.** Hematoxylin and eosin (H&E) and immunohistochemical analysis of H3K27ac in our mouse model of ZFTA-RELA driven ependymoma (mST-EP-ZFTA<sup>FUS</sup>), non-ZFTA-RELA driven ependymoma driven by RTBDN (mST-EP-RTBDN) and a human patient derived xenograft of human mST-EP-ZFTA<sup>FUS</sup> (PDX-mST-EP-ZFTA<sup>FUS</sup>). Scale bar=100 $\mu$ m **D.** Principal Component Analyses of histone mark ChIP-seq profiles in mNSCs transduced with ZFTA-RELA<sup>FUS1</sup> or empty vector control. **E.** Volcano plots depicting changes in histone marks in mNSCs transduced with ZFTA-RELA<sup>FUS1</sup> vs. vector control (peaks called with Sicer; n=4 replicates).
