# Supplementary material
Source: PubMed Central journal article supplement (PMC8918067)
Supplement: NIHMS1783817-supplement-Supp_Fig_S5.pdf [file NIHMS1783817-supplement-Supp_Fig_S5.pdf]

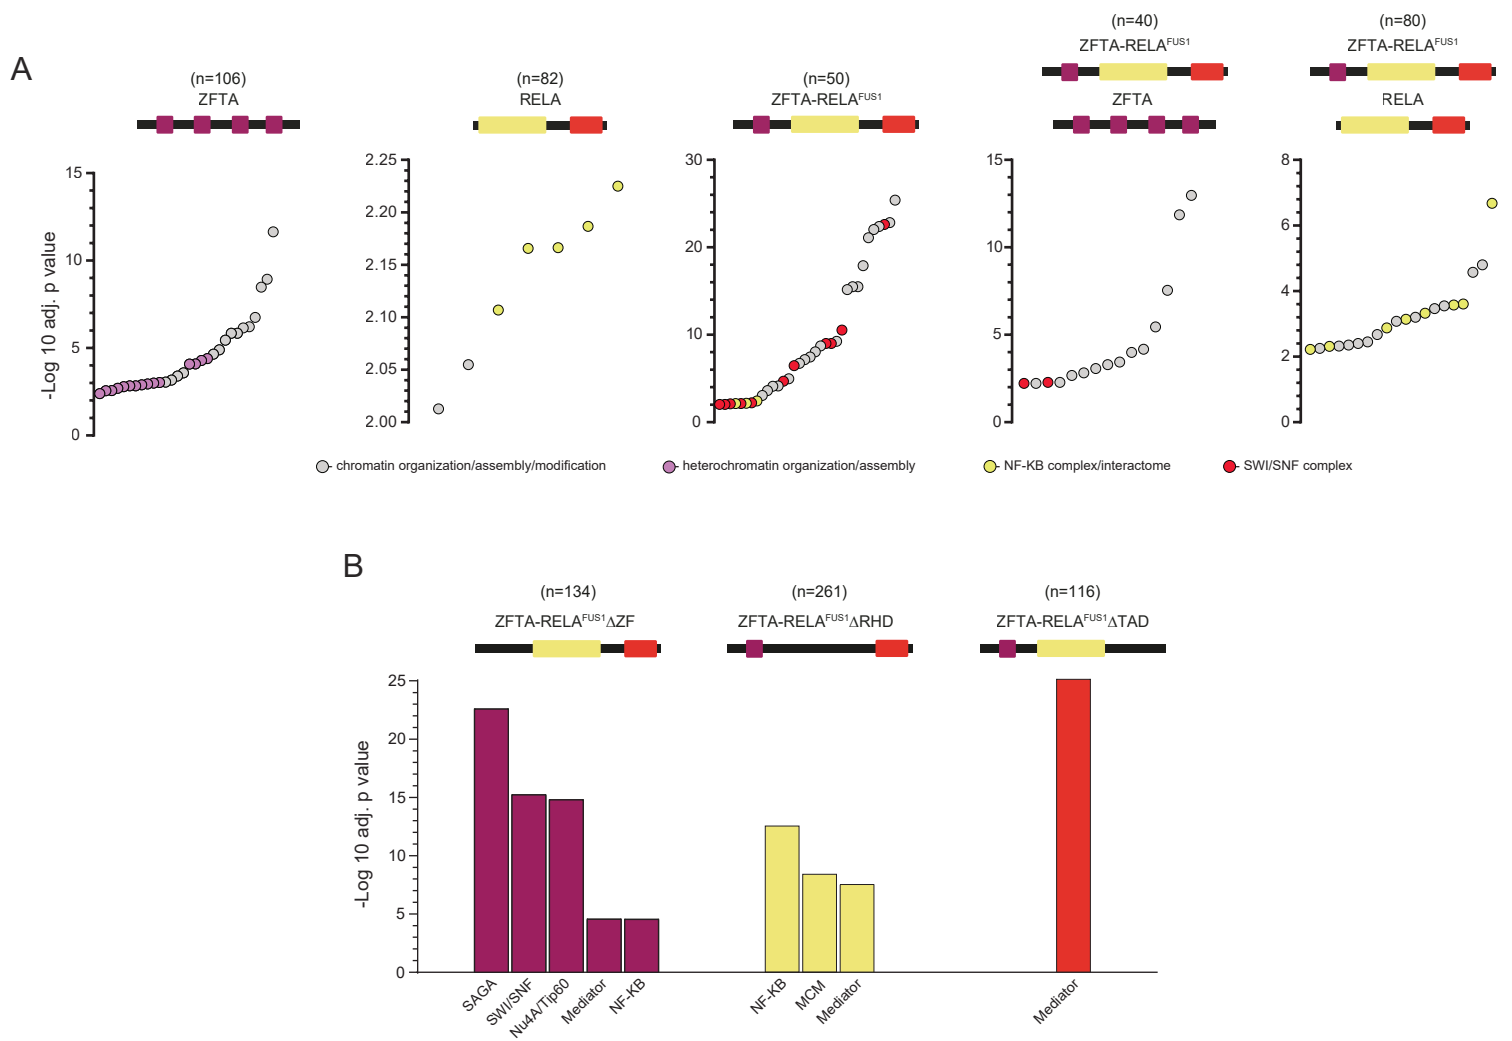

**Figure S5. ZFTA-RELA<sup>FUS1</sup> domain interactomes: A.** Genesets (among 18,225) significantly enriched among proteins binding specifically to the indicated wild-type partner or fusion protein. Number of significantly bound proteins are shown in parenthesis. Non-redundant, specific binding interactomes were identified in chromatin, heterochromatin, NF-κB and SWI/SNF pathways. **B.** Protein complexes enriched among proteins whose binding was specifically and selectively lost from the deletion mutants. Number of significantly lost bound proteins are shown in parenthesis. Protein complexes are from among 4274 in the CORUM database.
