# Supplementary material
Source: PubMed Central journal article supplement (PMC8918067)
Supplement: NIHMS1783817-supplement-Supp_Fig_S6.pdf [file NIHMS1783817-supplement-Supp_Fig_S6.pdf]

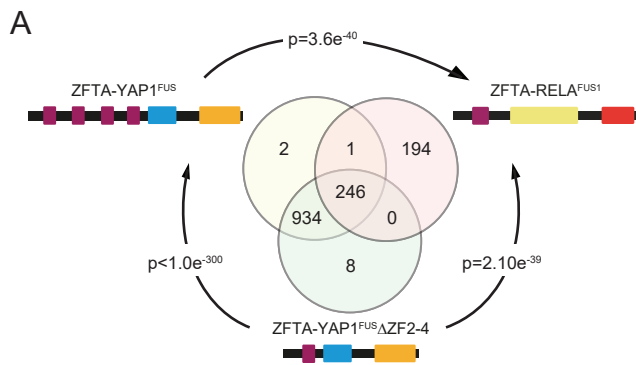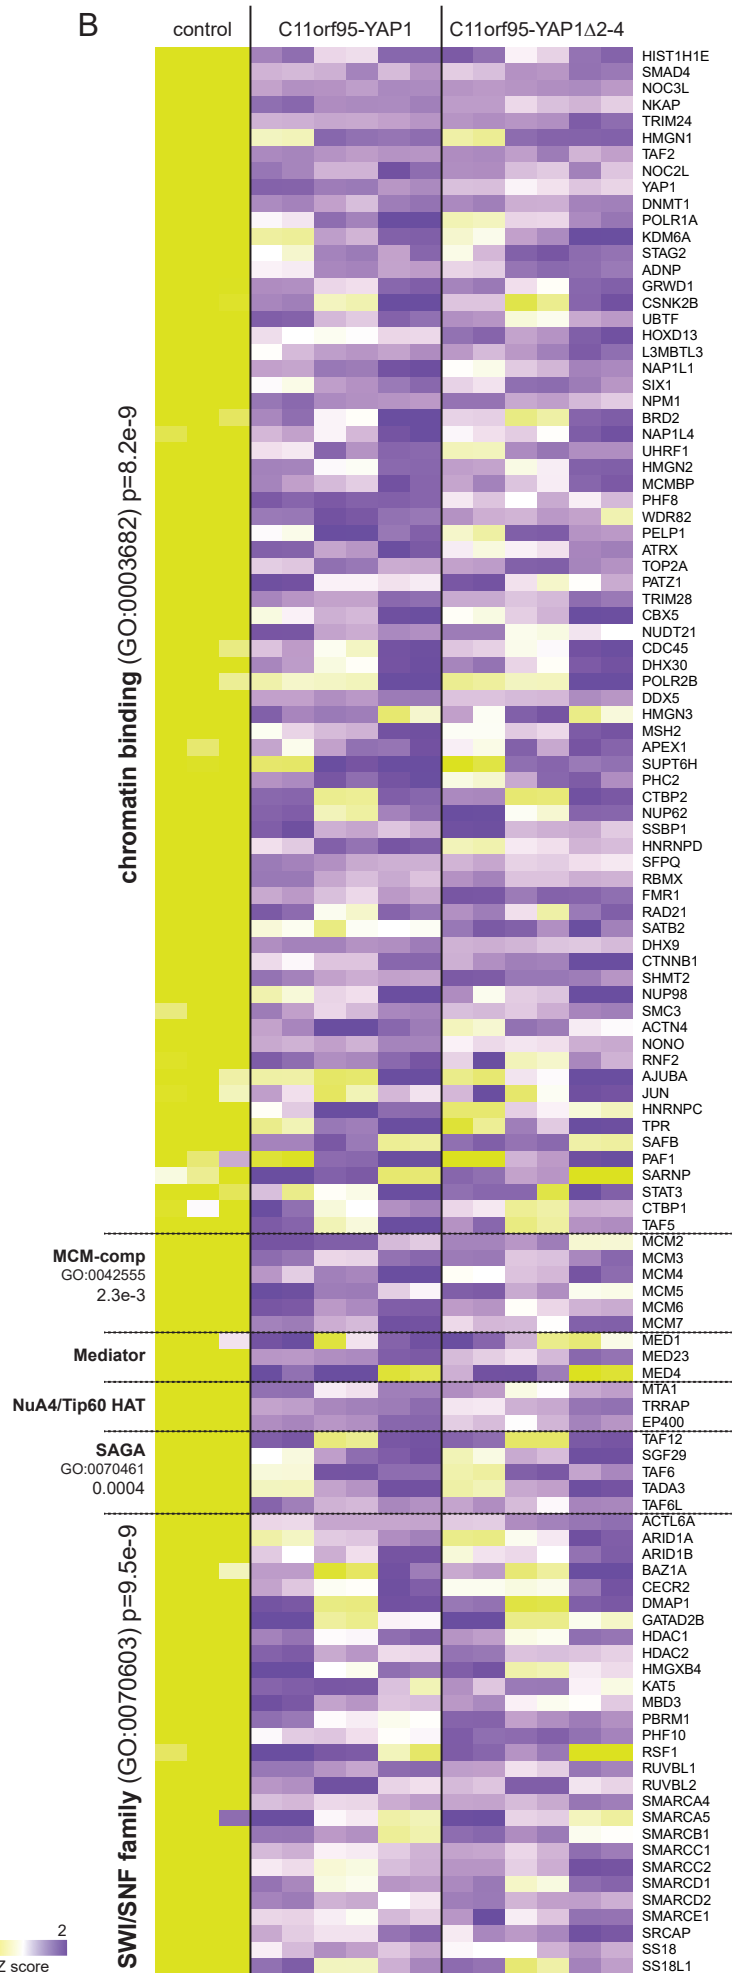

**Figure S6. ZFTA-YAP1 interactome: A.** Venn diagram of overlap in qPLEX-RIME detected protein interactomes of the indicated fusion proteins (FDR<0.05 relative to empty vector). **B.** Heat map of significant protein interactors (right) with ZFTA-YAP1 or ZFTA-YAP1 $\Delta$ 2-4 proteins. Functions and protein Complexes enriched among binding partners are shown left.
